# Supplementary material for: Metabolic Signatures of Adiposity in Young Adults: Mendelian Randomization Analysis and Effects of Weight Change
Source: PubMed Central journal article supplement (PMC4260795; doi:10.1371/journal.pmed.1001765), 2014-12-09
Supplement: pmed.1001765.s001.pdf [file pmed.1001765.s001.pdf]

**Figure S1: Correlations of the assayed metabolic measures.**

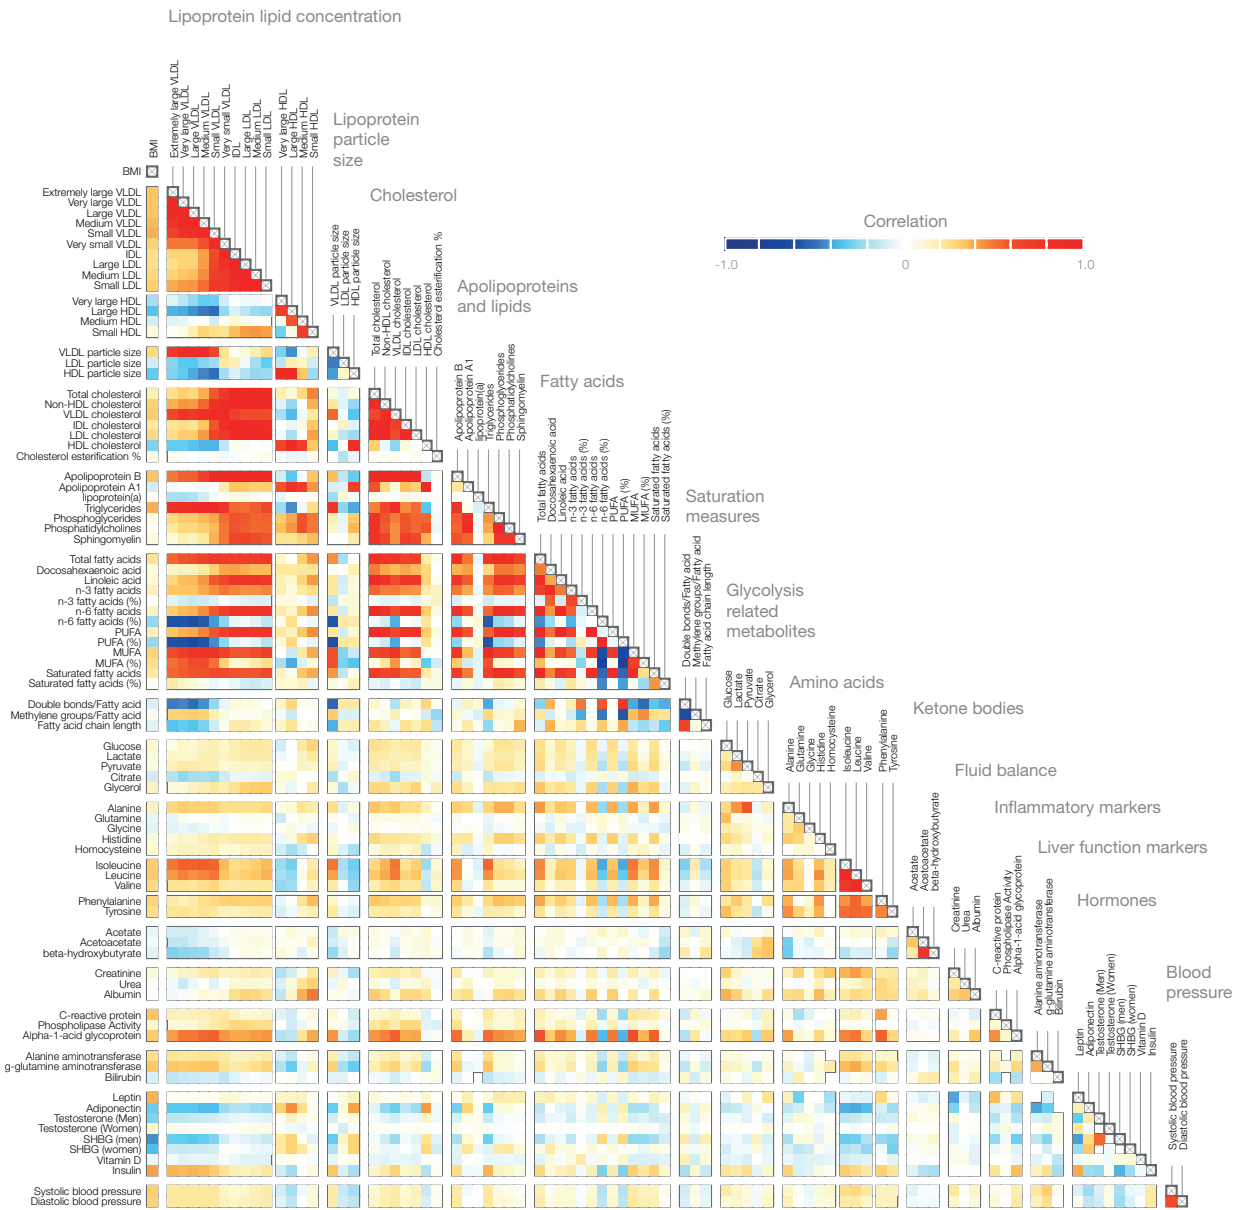

The color coding indicates Spearman's correlation coefficients analyzed across the four study populations using inverse-variance weighted meta-analysis (n=12,664).
