# Supplementary material for: Metabolic Signatures of Adiposity in Young Adults: Mendelian Randomization Analysis and Effects of Weight Change
Source: PubMed Central journal article supplement (PMC4260795; doi:10.1371/journal.pmed.1001765), 2014-12-09
Supplement: pmed.1001765.s003.pdf [file pmed.1001765.s003.pdf]

**Figure S3. Correspondence between gene score and cross-sectional associations with metabolic measures when the gene score associations are adjusted for observed BMI.**

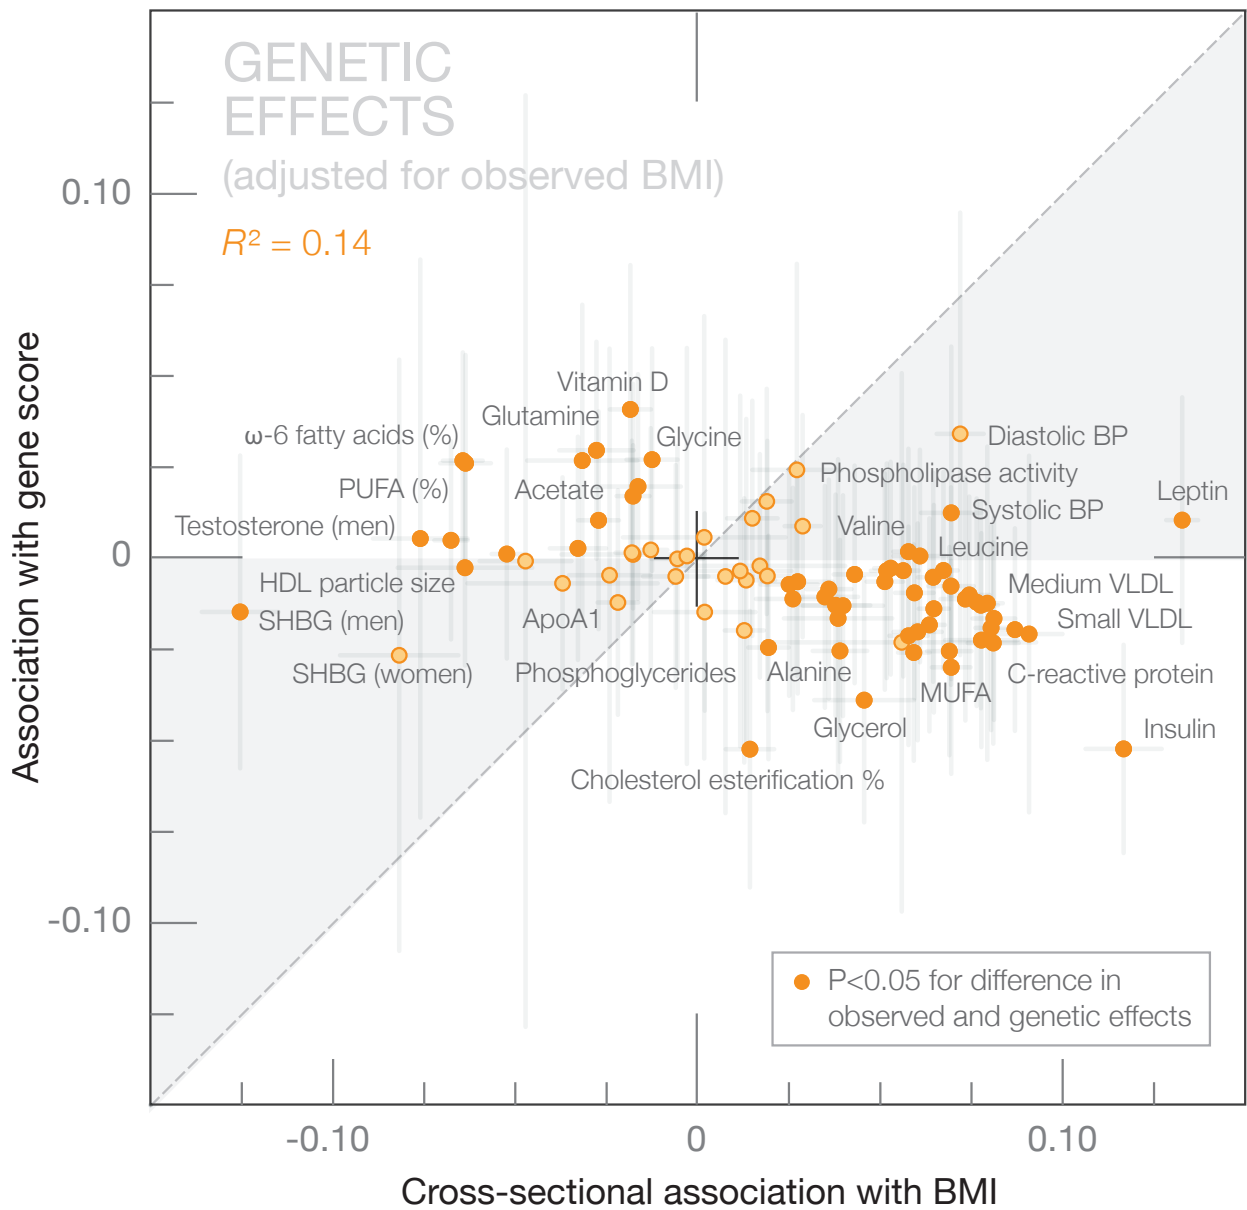

For the analyses of potential pleiotropy, the gene score for predisposition to elevated BMI was scaled to be associated with exactly 1-kg/m<sup>2</sup> unit increment in BMI; association magnitudes are hereby comparable to the magnitudes of the causal effect estimates shown in Figure 4 and Figure 5. Filled dots indicate significant difference between cross-sectional and genetic associations.

BP, blood pressure; MUFA, monounsaturated fatty acid; PUFA, polyunsaturated fatty acid; SHBG, sex hormone-binding globulin.
