# Supplementary material for: Metabolic Signatures of Adiposity in Young Adults: Mendelian Randomization Analysis and Effects of Weight Change
Source: PubMed Central journal article supplement (PMC4260795; doi:10.1371/journal.pmed.1001765), 2014-12-09
Supplement: pmed.1001765.s004.pdf [file pmed.1001765.s004.pdf]

**Figure S4. Associations of metabolite changes with change in BMI at 6-year and 10-year follow-up in the Cardiovascular Risk in Young Finns Study, and at 6-year follow-up in the Pieksämäki Study.**

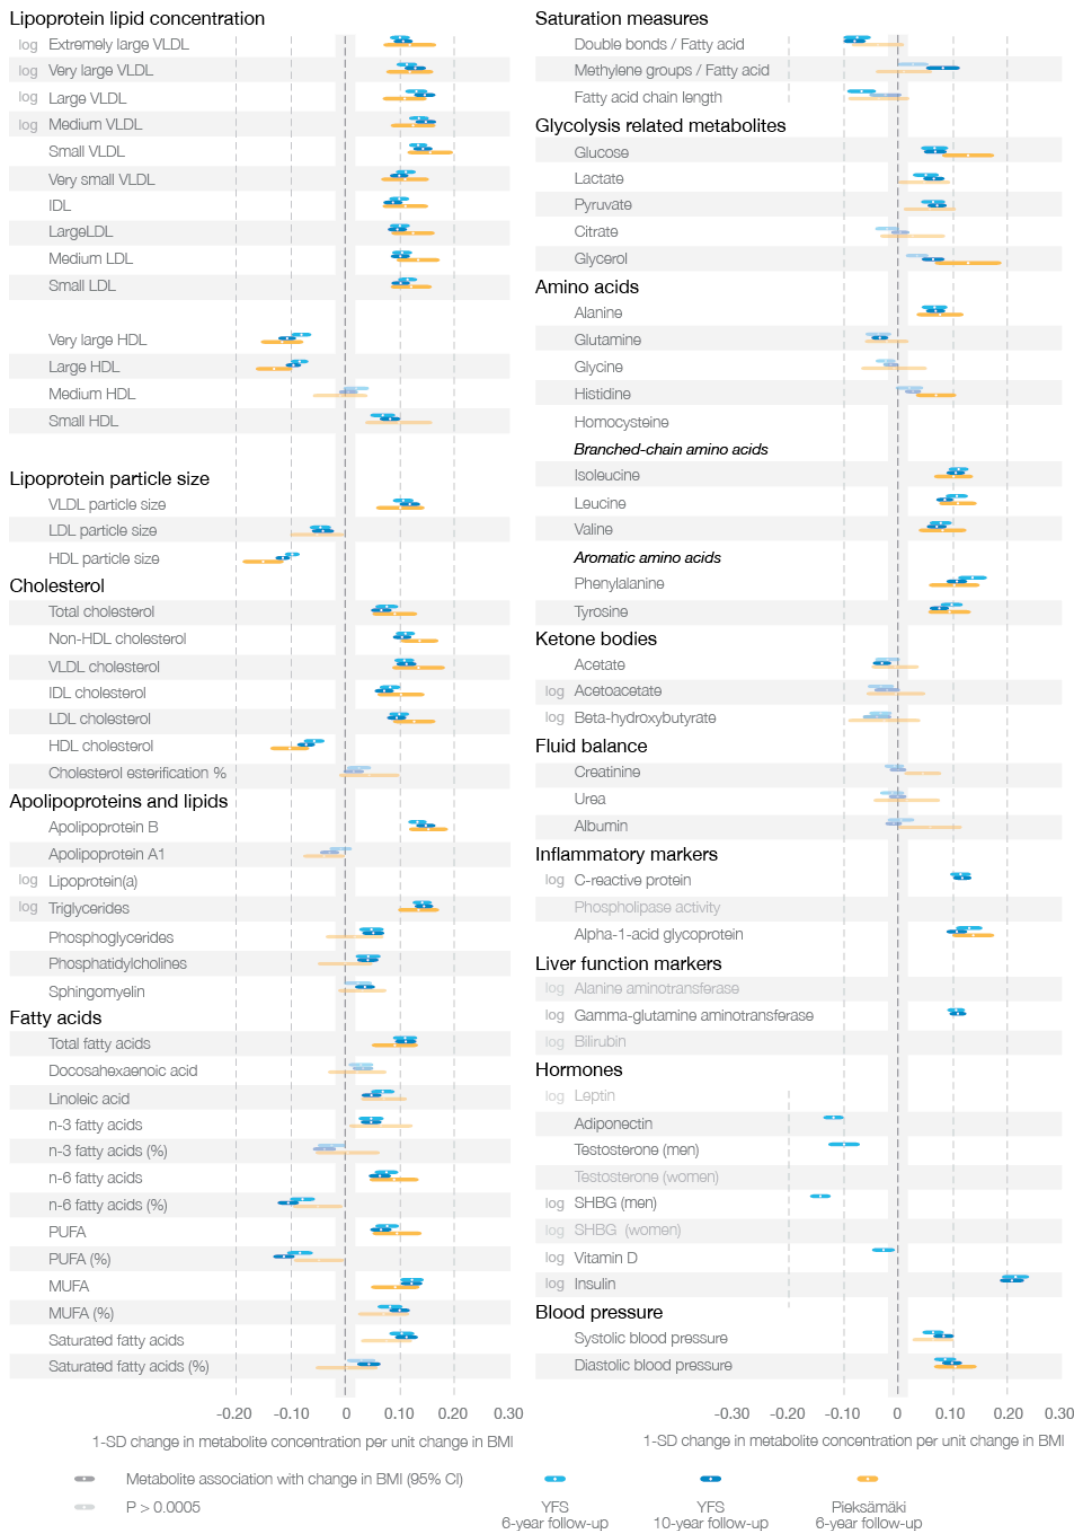

Association magnitudes are in units of change in metabolite concentration, scaled to 1-SD units at baseline, per 1-kg/m<sup>2</sup> change in BMI. White dots indicate  $\beta$ -regression coefficients, colored shading indicates 95% confidence intervals, and darker shading denotes  $p < 0.0005$ . Longitudinal associations were assessed in YFS during 6-year ( $n=1,488$ ; light blue) and 10-year follow-up ( $n=1,372$ ; dark blue). The longitudinal associations are also shown for 456 middle-aged persons from the Pieksämäki Study at 6-year follow-up (yellow). Associations were adjusted for sex and age, baseline metabolite concentration, change in smoking, change in alcohol intake, and change in physical activity index.
