# Supplementary material for: Metabolic Signatures of Adiposity in Young Adults: Mendelian Randomization Analysis and Effects of Weight Change
Source: PubMed Central journal article supplement (PMC4260795; doi:10.1371/journal.pmed.1001765), 2014-12-09
Supplement: pmed.1001765.s005.pdf [file pmed.1001765.s005.pdf]

**Table S1: Mean metabolite concentrations in each cohort and conversion factors to absolute units.**

| Metabolite                                 | NFBC 1986<br>(n=3,976) | NFBC 1966<br>(n=4,671) | Cardiovascular<br>Risk in Young<br>Finns (n=2,171) | FINRISK 1997<br>(n=1,846) | Conversion<br>factor to<br>absolute unit* |
|--------------------------------------------|------------------------|------------------------|----------------------------------------------------|---------------------------|-------------------------------------------|
| <b>Lipoprotein lipid concentration</b>     |                        |                        |                                                    |                           |                                           |
| Extremely large VLDL [ $\mu\text{mol/L}$ ] | 13 (19)                | 17 (27)                | 19 (29)                                            | 25 (29)                   | 24                                        |
| Very large VLDL [ $\mu\text{mol/L}$ ]      | 47 (51)                | 52 (70)                | 56 (71)                                            | 49 (59)                   | 56                                        |
| Large VLDL [ $\mu\text{mol/L}$ ]           | 187 (178)              | 212 (244)              | 251 (234)                                          | 148 (161)                 | 150                                       |
| Medium VLDL [mmol/L]                       | 0.41 (0.25)            | 0.49 (0.35)            | 0.55 (0.32)                                        | 0.33 (0.22)               | 0.19                                      |
| Small VLDL [mmol/L]                        | 0.50 (0.18)            | 0.65 (0.27)            | 0.61 (0.23)                                        | 0.56 (0.22)               | 0.24                                      |
| Very small VLDL [mmol/L]                   | 0.41 (0.12)            | 0.52 (0.16)            | 0.51 (0.14)                                        | 0.54 (0.18)               | 0.16                                      |
| IDL [mmol/L]                               | 0.96 (0.25)            | 1.22 (0.35)            | 1.19 (0.29)                                        | 1.17 (0.33)               | 0.33                                      |
| Large LDL [mmol/L]                         | 1.16 (0.31)            | 1.54 (0.46)            | 1.48 (0.38)                                        | 1.39 (0.39)               | 0.43                                      |
| Medium LDL [mmol/L]                        | 0.67 (0.19)            | 0.92 (0.29)            | 0.88 (0.24)                                        | 0.81 (0.25)               | 0.27                                      |
| Small LDL [mmol/L]                         | 0.41 (0.13)            | 0.57 (0.19)            | 0.56 (0.16)                                        | 0.54 (0.18)               | 0.18                                      |
| Very large HDL [mmol/L]                    | 0.38 (0.19)            | 0.47 (0.22)            | 0.37 (0.21)                                        | 0.72 (0.25)               | 0.24                                      |
| Large HDL [mmol/L]                         | 0.76 (0.29)            | 0.85 (0.42)            | 0.79 (0.40)                                        | 0.93 (0.35)               | 0.37                                      |
| Medium HDL [mmol/L]                        | 0.85 (0.19)            | 0.93 (0.29)            | 1.00 (0.24)                                        | 0.74 (0.21)               | 0.26                                      |
| Small HDL [mmol/L]                         | 1.07 (0.14)            | 1.20 (0.20)            | 1.25 (0.16)                                        | 1.00 (0.13)               | 0.18                                      |
| <b>Lipoprotein particle size</b>           |                        |                        |                                                    |                           |                                           |
| VLDL particle size [nm]                    | 36.5 (1.30)            | 36.2 (1.37)            | 36.6 (1.37)                                        | 35.4 (1.12)               | 1.37                                      |
| LDL particle size [nm]                     | 23.6 (0.19)            | 23.5 (0.18)            | 23.5 (0.17)                                        | 23.5 (0.18)               | 0.18                                      |
| HDL particle size [nm]                     | 9.91 (0.22)            | 9.93 (0.26)            | 9.88 (0.26)                                        | 10.2 (0.25)               | 0.26                                      |
| <b>Cholesterol</b>                         |                        |                        |                                                    |                           |                                           |
| Total cholesterol [mmol/L]                 | 4.20 (0.86)            | 5.32 (1.24)            | 5.00 (0.97)                                        | 4.98 (0.98)               | 1.15                                      |
| Non-HDL cholesterol [mmol/L]               | 2.76 (0.75)            | 3.65 (1.12)            | 3.40 (0.92)                                        | 3.33 (0.97)               | 1.03                                      |
| VLDL cholesterol [mmol/L]                  | 0.61 (0.20)            | 0.77 (0.29)            | 0.68 (0.26)                                        | 0.72 (0.25)               | 0.26                                      |
| IDL cholesterol [mmol/L]                   | 0.63 (0.16)            | 0.80 (0.22)            | 0.74 (0.19)                                        | 0.75 (0.20)               | 0.21                                      |
| LDL cholesterol [mmol/L]                   | 1.52 (0.46)            | 2.09 (0.69)            | 1.98 (0.56)                                        | 1.86 (0.57)               | 0.63                                      |
| HDL cholesterol [mmol/L]                   | 1.45 (0.30)            | 1.67 (0.44)            | 1.60 (0.38)                                        | 1.64 (0.34)               | 0.39                                      |
| Cholesterol esterification [%]             | 72.2 (1.1)             | 74.2 (2.1)             | 72.3 (1.7)                                         | 77.1 (3.0)                | 2.87                                      |
| <b>Apolipoproteins and lipids</b>          |                        |                        |                                                    |                           |                                           |
| Apolipoprotein B [g/L]                     | 0.79 (0.18)            | 0.98 (0.25)            | 0.95 (0.23)                                        | 0.92 (0.23)               | 0.24                                      |
| Apolipoprotein A1 [g/L]                    | 1.50 (0.22)            | 1.69 (0.25)            | 1.68 (0.24)                                        | 1.69 (0.23)               | 0.25                                      |
| Lipoprotein(a) [mg/L]                      | —                      | —                      | 143 (167)                                          | 95 (134)                  | 1.16                                      |
| Triglycerides [mmol/L]                     | 0.95 (0.43)            | 1.16 (0.62)            | 1.28 (0.58)                                        | 1.05 (0.50)               | 0.23                                      |
| Phosphoglycerides [mmol/L]                 | 1.83 (0.37)            | 1.82 (0.50)            | 1.73 (0.39)                                        | 1.53 (0.39)               | 0.53                                      |
| Phosphatidylcholines [mmol/L]              | 1.90 (0.31)            | 2.12 (0.52)            | 2.08 (0.43)                                        | 1.81 (0.39)               | 0.44                                      |
| Sphingomyelin [mmol/L]                     | 0.47 (0.08)            | 0.36 (0.08)            | 0.29 (0.06)                                        | 0.26 (0.06)               | 0.11                                      |
| <b>Fatty acids</b>                         |                        |                        |                                                    |                           |                                           |
| Total fatty acids [mmol/L]                 | 11.0 (2.4)             | 11.5 (3.1)             | 10.9 (2.7)                                         | 11.1 (3.1)                | 2.85                                      |
| Docosaehaenoic acid [mmol/L]               | 0.15 (0.05)            | 0.18 (0.07)            | 0.17 (0.07)                                        | 0.17 (0.07)               | 0.065                                     |
| Linoleic acid [mmol/L]                     | 2.74 (0.54)            | 3.34 (0.79)            | 3.12 (0.61)                                        | 3.21 (0.67)               | 0.72                                      |
| n-3 fatty acids [mmol/L]                   | 0.41 (0.11)            | 0.40 (0.15)            | 0.39 (0.14)                                        | 0.42 (0.14)               | 0.14                                      |
| n-3 fatty acids/<br>total fatty acids [%]  | 3.8 (0.7)              | 3.5 (1.0)              | 3.6 (1.0)                                          | 3.8 (0.9)                 | 0.89                                      |
| n-6 fatty acids [mmol/L]                   | 3.48 (0.64)            | 3.97 (0.93)            | 3.63 (0.70)                                        | 3.84 (0.83)               | 0.82                                      |
| n-6 fatty acids/<br>total fatty acids [%]  | 31.8 (2.3)             | 34.9 (3.7)             | 33.9 (4.0)                                         | 35.1 (3.9)                | 3.68                                      |

|                                                 |             |             |             |             |       |
|-------------------------------------------------|-------------|-------------|-------------|-------------|-------|
| PUFA [mmol/L]                                   | 3.89 (0.73) | 4.37 (1.03) | 4.01 (0.78) | 4.27 (0.96) | 0.92  |
| PUFA/<br>total fatty acids [%]                  | 35.5 (2.5)  | 38.3 (3.7)  | 37.4 (4.0)  | 38.9 (4.0)  | 3.72  |
| MUFA [mmol/L]                                   | 2.67 (0.74) | 3.28 (1.13) | 3.32 (1.08) | 3.12 (1.08) | 1.05  |
| MUFA/<br>total fatty acids [%]                  | 24.1 (2.3)  | 28.2 (3.6)  | 30.2 (3.4)  | 27.9 (3.5)  | 3.93  |
| Saturated fatty acids [mmol/L]                  | 4.45 (0.95) | 3.87 (1.16) | 3.55 (1.00) | 3.70 (1.12) | 1.12  |
| Saturated fatty acids/<br>total fatty acids [%] | 40.4 (1.5)  | 33.5 (2.7)  | 32.4 (2.3)  | 33.2 (2.8)  | 4.12  |
| <b>Saturation measures</b>                      |             |             |             |             |       |
| Double bonds/<br>Fatty acid                     | 1.15 (0.05) | 1.26 (0.08) | 1.27 (0.08) | 1.25 (0.09) | 0.091 |
| Methylene groups/<br>Fatty acid                 | 9.1 (0.3)   | 9.8 (0.2)   | 9.7 (0.2)   | 9.5 (0.3)   | 0.39  |
| Fatty acid chain length                         | 17.2 (0.2)  | 18.2 (0.2)  | 18.1 (0.2)  | 17.9 (0.3)  | 0.47  |
| <b>Glycolysis related metabolites</b>           |             |             |             |             |       |
| Serum glucose [mmol/L]                          | 4.54 (0.53) | 4.81 (0.84) | 4.92 (0.61) | 4.3 (0.44)  | 0.69  |
| Lactate [mmol/L]                                | 1.47 (0.34) | 1.57 (0.47) | 1.56 (0.41) | 1.23 (0.29) | 0.42  |
| Pyruvate [μmol/L]                               | 74 (20)     | 89 (27)     | 86 (29)     | 72 (20)     | 0.025 |
| Citrate [μmol/L]                                | 103 (23)    | 106 (20)    | 112 (22)    | 107 (18)    | 21.2  |
| Glycerol [μmol/L]                               | 68 (28)     | 88 (36)     | 91 (40)     | 120 (49)    | 40.4  |
| <b>Amino acids</b>                              |             |             |             |             |       |
| Alanine [μmol/L]                                | 406 (65)    | 439 (81)    | 424 (70)    | 414 (59)    | 72.7  |
| Glutamine [μmol/L]                              | 525 (72)    | 557 (102)   | 541 (94)    | 473 (67)    | 91.2  |
| Glycine [μmol/L]                                | 284 (48)    | 331 (73)    | 315 (72)    | 311 (58)    | 66.0  |
| Histidine [μmol/L]                              | 65 (10)     | 71 (14)     | 72 (12)     | 65 (10)     | 12.1  |
| Homocysteine [μmol/l]                           | —           | —           | 9.7 (2.9)   | 10.8 (3.1)  | 3.05  |
| Isoleucine [μmol/L]                             | 55 (13)     | 56 (17)     | 59 (17)     | 55 (18)     | 16.3  |
| Leucine [μmol/L]                                | 84 (16)     | 92 (21)     | 89 (21)     | 84 (20)     | 20.0  |
| Valine [μmol/L]                                 | 203 (34)    | 214 (37)    | 213 (38)    | 197 (37)    | 37.0  |
| Phenylalanine [μmol/L]                          | 71 (11)     | 85 (15)     | 78 (12)     | 79 (12)     | 14.5  |
| Tyrosine [μmol/L]                               | 52 (11)     | 54 (13)     | 57 (12)     | 48 (13)     | 12.6  |
| <b>Ketone bodies</b>                            |             |             |             |             |       |
| Acetate [μmol/L]                                | 46 (10)     | 43 (12)     | 44 (14)     | 49 (14)     | 12.1  |
| Acetoacetate [μmol/L]                           | 48 (36)     | 53 (36)     | 48 (31)     | 72 (43)     | 0.59  |
| beta-hydroxybutyrate [μmol/L]                   | 135 (101)   | 152 (106)   | 102 (74.3)  | 218 (150)   | 0.61  |
| <b>Fluid balance</b>                            |             |             |             |             |       |
| Creatinine [μmol/L]                             | 55 (10)     | 65 (14)     | 66 (12)     | 56 (11)     | 13.0  |
| Urea [μmol/L]                                   | 47 (23)     | 57 (28)     | 77 (34)     | 47 (24)     | 29.1  |
| Albumin [cu]                                    | 0.10 (0.01) | 0.10 (0.02) | 0.10 (0.01) | 0.10 (0.01) | 0.014 |
| <b>Inflammatory markers</b>                     |             |             |             |             |       |
| C-reactive protein [mg/L]                       | 0.9 (2.7)   | 1.9 (3.7)   | 1.7 (3.3)   | 1.7 (2.9)   | 1.62  |
| Phospholipase activity [cu]                     | —           | —           | 10.0 (1.0)  | 9.8 (1.0)   | 1.00  |
| Glycoprotein acetyls [cu]                       | 1.34 (0.21) | 1.38 (0.27) | 1.38 (0.26) | 1.29 (0.21) | 0.24  |
| <b>Liver function markers</b>                   |             |             |             |             |       |
| Alanine aminotransferase [U/L]                  | 11.0 (6.7)  | 9.3 (4.6)   | 18.3 (12.5) | 11.0 (6.7)  | 0.47  |
| Gamma-glutamine<br>aminotransferase [U/L]       | 14.6 (7.4)  | 21.2 (19.7) | 25.0 (20.1) | 25.6 (19.0) | 0.59  |
| Bilirubin [μmol/L]                              | 4.0 (2.3)   | 3.8 (2.7)   | —           | —           | 0.81  |

| <b>Hormones</b>                 |            |            |            |            |      |
|---------------------------------|------------|------------|------------|------------|------|
| Leptin [ng/mL]                  | —          | —          | 10.7 (9.2) | 9.7 (9.4)  | 0.90 |
| Adiponectin [µg/mL]             | —          | —          | 9.4 (4.4)  | 6.4 (3.9)  | 4.46 |
| Testosterone (Men) [nmol/L]     | 20.5 (6.6) | 21.7 (6.4) | 18.4 (5.4) | 18.1 (6.6) | 6.47 |
| Testosterone (Women) [nmol/L]   | 1.7 (0.6)  | 1.1 (0.5)  | 1.6 (0.8)  | 1.2 (0.5)  | 0.65 |
| SHBG (Men) [nmol/L]             | 32 (14)    | 34 (13)    | 31 (12)    | —          | 0.41 |
| SHBG (Women) [nmol/L]           | 67 (53)    | 64 (32)    | 83 (61)    | —          | 0.58 |
| Vitamin D [nmol/L]              | —          | 20 (5.8)   | 44 (15)    | 13 (6.0)   | 0.62 |
| Insulin [IU/L]                  | 10.5 (5.0) | 8.3 (3.7)  | 7.6 (5.0)  | 5.5 (3.9)  | 0.51 |
| <b>Blood pressure</b>           |            |            |            |            |      |
| Systolic blood pressure [mmHg]  | 116 (13)   | 125 (13)   | 117 (13)   | 125 (14)   | 14.0 |
| Diastolic blood pressure [mmHg] | 68 (8)     | 77 (11)    | 71 (11)    | 77 (10)    | 10.9 |

\* Multiplication factor (standard deviation of the metabolic measure in the study) to convert the association magnitudes reported in the figures to absolute concentrations units [e.g. mmol/L]. For example, each kg/m<sup>2</sup> unit higher BMI is associated with 0.0739 SD higher diastolic blood pressure, which corresponds to 0.806 mmHg higher diastolic blood pressure per BMI-unit (10.9 mmHg × 0.0739 SD). For metabolic measures that were log-transformed, the standard deviation of the transformed measure is indicated. Cross-sectional, instrumental variable and longitudinal association magnitudes in absolute concentration units are listed in Table S3.

*Abbreviations:* cu = standardized concentration unit; HDL, high-density lipoprotein; LDL, low-density lipoprotein; MUFA=monounsaturated fatty acids; PUFA=polyunsaturated fatty acids; SHBG=sex-hormone binding globulin; VLDL, very-low-density lipoprotein.
