# Supplementary material for: Metabolic Signatures of Adiposity in Young Adults: Mendelian Randomization Analysis and Effects of Weight Change
Source: PubMed Central journal article supplement (PMC4260795; doi:10.1371/journal.pmed.1001765), 2014-12-09
Supplement: pmed.1001765.s006.pdf [file pmed.1001765.s006.pdf]

**Table S2: Correlations between the gene score for elevated BMI and potential confounders.**

| Potential confounder                           | NFBC 1986                                                    | NFBC 1966              | Cardiovascular Risk in Young Finns | FINRISK 1997                      |
|------------------------------------------------|--------------------------------------------------------------|------------------------|------------------------------------|-----------------------------------|
| Sex                                            | -0.025; P=0.11                                               | 0.014; P=0.32          | 0.019; P=0.38                      | -0.014; P=0.54                    |
| Age (years)                                    | —                                                            | —                      | 0.0076; P=0.72                     | 0.00059; P=0.98                   |
| Smoking (yes/no)                               | -0.0073; P=0.65                                              | 0.0097; P=0.51         | -0.0057; P=0.79                    | 0.04; P=0.082                     |
| Alcohol usage (grams/week)                     | —                                                            | -0.023; P=0.12         | -0.025; P=0.25                     | -0.027; P=0.25                    |
| Physical activity index (Metabolic equivalent) | -0.0069; P=0.66                                              | -0.0025; P=0.86        | 0.016; P=0.46                      | 0.034; P=0.14 (categorical index) |
| Socio-economic status (SES)                    | -0.03; P=0.05 (mother's SES)<br>-0.02; P=0.16 (father's SES) | 0.01; P=0.48 (own SES) | 0.01; P=0.73 (own SES)             | 0.03; P=0.15 (years of education) |

Correlations are Spearman's coefficients. Results were similar in sex-stratified analyses.
