# Supplementary material for: Metabolic Signatures of Adiposity in Young Adults: Mendelian Randomization Analysis and Effects of Weight Change
Source: PubMed Central journal article supplement (PMC4260795; doi:10.1371/journal.pmed.1001765), 2014-12-09
Supplement: pmed.1001765.s007.pdf [file pmed.1001765.s007.pdf]

**Table S3: Cross-sectional associations, causal effect estimates, and longitudinal associations of BMI with systemic metabolites in absolute concentration units.**

| Metabolite measure [unit]                | <i>n</i> | Cross-sectional association [beta (95% CI); <i>P</i> per kg/m <sup>2</sup> ] | Causal effect estimate [beta (95% CI); <i>P</i> per kg/m <sup>2</sup> ] | <i>P</i> for diff. with cross-sectional association | Longitudinal association [beta (95% CI); <i>P</i> per kg/m <sup>2</sup> change] | <i>P</i> for diff. with sectional association |
|------------------------------------------|----------|------------------------------------------------------------------------------|-------------------------------------------------------------------------|-----------------------------------------------------|---------------------------------------------------------------------------------|-----------------------------------------------|
| <i>log</i> Extremely large VLDL [μmol/L] | 12,642   | 1.87<br>(1.77–1.97)<br><i>P</i> =9e-287                                      | 1.59<br>(0.902–2.28)<br><i>P</i> =6e-6                                  | 0.43                                                | 2.63<br>(2.08–3.19)<br><i>P</i> =8e-20                                          | 0.008                                         |
| <i>log</i> Very large VLDL [μmol/L]      | 12,642   | 4.33<br>(4.07–4.59)<br><i>P</i> =2e-231                                      | 3.62<br>(2.06–5.19)<br><i>P</i> =5e-6                                   | 0.38                                                | 6.79<br>(5.53–8.06)<br><i>P</i> =7e-25                                          | 2e-4                                          |
| <i>log</i> Large VLDL [μmol/L]           | 12,639   | 12.4<br>(11.7–13.0)<br><i>P</i> =4e-294                                      | 9.5<br>(5.21–13.8)<br><i>P</i> =1e-5                                    | 0.19                                                | 22.1<br>(18.7–25.6)<br><i>P</i> =2e-34                                          | 6e-8                                          |
| <i>log</i> Medium VLDL [mmol/L]          | 12,643   | 0.0153<br>(0.0142–0.0164)<br><i>P</i> =5e-163                                | 0.0121<br>(0.00693–0.0173)<br><i>P</i> =5e-6                            | 0.24                                                | 0.0282<br>(0.0244–0.032)<br><i>P</i> =7e-45                                     | 2e-10                                         |
| Small VLDL [mmol/L]                      | 12,643   | 0.0194<br>(0.0177–0.0211)<br><i>P</i> =3e-114                                | 0.0138<br>(0.00718–0.0203)<br><i>P</i> =4e-5                            | 0.10                                                | 0.0354<br>(0.031–0.0398)<br><i>P</i> =1e-51                                     | 3e-11                                         |
| Very small VLDL [mmol/L]                 | 12,643   | 0.0102<br>(0.0095–0.0109)<br><i>P</i> =1e-188                                | 0.00732<br>(0.00249–0.0121)<br><i>P</i> =0.003                          | 0.25                                                | 0.0198<br>(0.0168–0.0229)<br><i>P</i> =2e-34                                    | 2e-9                                          |
| IDL [mmol/L]                             | 12,643   | 0.0169<br>(0.0152–0.0185)<br><i>P</i> =1e-90                                 | 0.0148<br>(0.00514–0.0245)<br><i>P</i> =0.003                           | 0.68                                                | 0.0367<br>(0.0304–0.043)<br><i>P</i> =7e-29                                     | 2e-9                                          |
| Large LDL [mmol/L]                       | 12,643   | 0.0221<br>(0.0202–0.024)<br><i>P</i> =6e-120                                 | 0.0207<br>(0.00831–0.0332)<br><i>P</i> =0.001                           | 0.83                                                | 0.0481<br>(0.0399–0.0563)<br><i>P</i> =1e-29                                    | 1e-9                                          |
| Medium LDL [mmol/L]                      | 12,643   | 0.0153<br>(0.0141–0.0164)<br><i>P</i> =4e-149                                | 0.0144<br>(0.00664–0.0222)<br><i>P</i> =0.0003                          | 0.84                                                | 0.0316<br>(0.0265–0.0367)<br><i>P</i> =4e-32                                    | 1e-9                                          |
| Small LDL [mmol/L]                       | 12,643   | 0.0118<br>(0.011–0.0125)<br><i>P</i> =2e-202                                 | 0.0109<br>(0.00572–0.0161)<br><i>P</i> =4e-5                            | 0.75                                                | 0.0225<br>(0.0191–0.026)<br><i>P</i> =5e-36                                     | 2e-9                                          |
| Very large HDL [mmol/L]                  | 12,641   | -0.00903<br>(-0.0154– -0.00266)<br><i>P</i> =0.005                           | -0.0109<br>(-0.0179– -0.00387)<br><i>P</i> =0.002                       | 0.70                                                | -0.0209<br>(-0.026– -0.0158)<br><i>P</i> =3e-15                                 | 0.005                                         |
| Large HDL [mmol/L]                       | 12,641   | -0.0253<br>(-0.027– -0.0236)<br><i>P</i> =4e-185                             | -0.0234<br>(-0.0335– -0.0133)<br><i>P</i> =6e-6                         | 0.71                                                | -0.0341<br>(-0.0402– -0.0281)<br><i>P</i> =1e-27                                | 0.006                                         |
| Medium HDL [mmol/L]                      | 12,643   | -0.00455<br>(-0.00962–0.000526)<br><i>P</i> =0.08                            | -0.00471<br>(-0.0124–0.00295)<br><i>P</i> =0.22                         | 0.97                                                | 0.00573<br>(-0.0011–0.0126)<br><i>P</i> =0.10                                   | 0.02                                          |
| Small HDL [mmol/L]                       | 12,643   | 0.00315<br>(-0.00115–0.00745)<br><i>P</i> =0.10                              | 0.00279<br>(-0.00279–0.00837)<br><i>P</i> =0.33                         | 0.92                                                | 0.0147<br>(0.00978–0.0197)<br><i>P</i> =6e-9                                    | 5e-4                                          |
| VLDL particle size [nm]                  | 12,643   | 0.0888<br>(0.0832–0.0945)<br><i>P</i> =4e-206                                | 0.0707<br>(0.0319–0.11)<br><i>P</i> =0.0004                             | 0.37                                                | 0.156<br>(0.126–0.186)<br><i>P</i> =1e-23                                       | 2e-5                                          |
| LDL particle size [nm]                   | 12,643   | -0.00494<br>(-0.00596– -0.00392)<br><i>P</i> =2e-21                          | -0.0033<br>(-0.00872–0.00212)<br><i>P</i> =0.23                         | 0.56                                                | -0.00712<br>(-0.0116– -0.00268)<br><i>P</i> =0.002                              | 0.35                                          |
| HDL particle size [nm]                   | 12,642   | -0.0166<br>(-0.0214– -0.0118)<br><i>P</i> =1e-11                             | -0.0177<br>(-0.0246– -0.0107)<br><i>P</i> =6e-7                         | 0.8                                                 | -0.026<br>(-0.0299– -0.0221)<br><i>P</i> =4e-37                                 | 3e-3                                          |
| Total cholesterol [mmol/L]               | 12,643   | 0.0415<br>(0.0344–0.0486)<br><i>P</i> =3e-30                                 | 0.0318<br>(-0.0025–0.066)<br><i>P</i> =0.07                             | 0.59                                                | 0.11<br>(0.0838–0.135)<br><i>P</i> =1e-16                                       | 6e-7                                          |
| Non-HDL cholesterol [mmol/L]             | 12,643   | 0.0612<br>(0.0558–0.0667)<br><i>P</i> =3e-107                                | 0.0515<br>(0.022–0.0811)<br><i>P</i> =0.0006                            | 0.53                                                | 0.128<br>(0.108–0.147)<br><i>P</i> =2e-36                                       | 8e-11                                         |
| VLDL cholesterol [mmol/L]                | 12,643   | 0.0181<br>(0.0165–0.0197)                                                    | 0.0114<br>(0.00398–0.0189)                                              | 0.085                                               | 0.0333<br>(0.0276–0.039)                                                        | 5e-7                                          |

|                                  |        |                                             |                                           |       |                                         |       |
|----------------------------------|--------|---------------------------------------------|-------------------------------------------|-------|-----------------------------------------|-------|
|                                  |        | P=8e-110                                    | P=0.003                                   |       | P=6e-29                                 |       |
| IDL cholesterol [mmol/L]         | 12,643 | 0.0089<br>(0.00771–0.0101)<br>P=7e-49       | 0.00794<br>(0.00183–0.014)<br>P=0.01      | 0.76  | 0.0201<br>(0.0159–0.0243)<br>P=2e-20    | 5e-7  |
| LDL cholesterol [mmol/L]         | 12,643 | 0.0335<br>(0.0306–0.0364)<br>P=1e-116       | 0.032<br>(0.0137–0.0503)<br>P=0.0006      | 0.88  | 0.0701<br>(0.058–0.0822)<br>P=8e-29     | 8e-9  |
| HDL cholesterol [mmol/L]         | 12,642 | -0.0202<br>(-0.0218– -0.0186)<br>P=2e-133   | -0.0196<br>(-0.0305– -0.0086)<br>P=0.0005 | 0.91  | -0.0235<br>(-0.0313– -0.0157)<br>P=5e-9 | 0.42  |
| Cholesterol esterification % [%] | 12,511 | 0.0414<br>(0.0223–0.0605)<br>P=2e-5         | -0.0943<br>(-0.198–0.00916)<br>P=0.07     | 0.011 | 0.0448<br>(-0.0402–0.13)<br>P=0.3       | 0.94  |
| Apolipoprotein B [g/l]           | 11,970 | 0.0175<br>(0.0159–0.0191)<br>P=4e-100       | 0.0151<br>(0.00812–0.0221)<br>P=2e-5      | 0.51  | 0.0346<br>(0.0304–0.0388)<br>P=3e-54    | 8e-14 |
| Apolipoprotein A1 [g/l]          | 11,970 | -0.00546<br>(-0.00686– -0.00406)<br>P=2e-14 | -0.00826<br>(-0.016– -0.000503)<br>P=0.04 | 0.49  | -0.00046<br>(-0.0064–0.0055)<br>P=0.90  | 0.11  |
| log Lipoprotein(a) [mg/L]        | 3,567  | 0.00219<br>(-0.0236–0.028)<br>P=0.9         | 0.00574<br>(-0.0635–0.075)<br>P=0.87      | 0.92  | —                                       | —     |
| log Triglycerides [mmol/L]       | 12,643 | 0.0204<br>(0.0195–0.0214)<br>P<1e-300       | 0.016<br>(0.00947–0.0224)<br>P=1e-6       | 0.18  | 0.0361<br>(0.0316–0.0406)<br>P=1e-51    | 3e-11 |
| Phosphoglycerides [mmol/L]       | 12,526 | 0.0104<br>(0.00742–0.0133)<br>P=5e-12       | -0.00246<br>(-0.0186–0.0137)<br>P=0.77    | 0.13  | 0.0343<br>(0.0207–0.048)<br>P=9e-7      | 8e-4  |
| Phosphatidylcholines [mmol/L]    | 12,520 | 0.00571<br>(0.00333–0.00809)<br>P=3e-6      | -0.00253<br>(-0.0172–0.0121)<br>P=0.74    | 0.28  | 0.027<br>(0.0152–0.0388)<br>P=8e-6      | 5e-4  |
| Sphingomyelin [mmol/L]           | 12,481 | 0.00311<br>(0.00258–0.00365)<br>P=3e-30     | 0.00402<br>(0.000739–0.00729)<br>P=0.02   | 0.59  | 0.00378<br>(0.000593–0.00698)<br>P=0.02 | 0.68  |
| Total fatty acids [mmol/L]       | 12,517 | 0.172<br>(0.154–0.191)<br>P=2e-71           | 0.114<br>(0.0291–0.198)<br>P=0.008        | 0.18  | 0.36<br>(0.292–0.427)<br>P=2e-24        | 2e-7  |
| Docosahexaenoic acid [mmol/L]    | 12,506 | 0.0017<br>(0.00105–0.00236)<br>P=4e-7       | 0.000986<br>(-0.000991–0.00296)<br>P=0.33 | 0.50  | 0.00323<br>(0.00164–0.00483)<br>P=7e-5  | 0.08  |
| Linoleic acid [mmol/L]           | 12,535 | 0.0181<br>(0.0125–0.0237)<br>P=3e-10        | 0.0124<br>(-0.00945–0.0342)<br>P=0.27     | 0.62  | 0.0614<br>(0.0443–0.0784)<br>P=2e-12    | 2e-6  |
| n-3 fatty acids [mmol/L]         | 12,542 | 0.00541<br>(0.00392–0.00689)<br>P=9e-13     | 0.00364<br>(-0.000428–0.0077)<br>P=0.08   | 0.42  | 0.00936<br>(0.00599–0.0127)<br>P=6e-8   | 0.04  |
| n-3 fatty acids [%]              | 12,528 | -0.00487<br>(-0.0113–0.00152)<br>P=0.10     | -0.00441<br>(-0.0319–0.0231)<br>P=0.75    | 0.97  | -0.0127<br>(-0.0365–0.0111)<br>P=0.3    | 0.53  |
| n-6 fatty acids [mmol/L]         | 12,521 | 0.0288<br>(0.0213–0.0364)<br>P=5e-14        | 0.0191<br>(-0.00591–0.044)<br>P=0.14      | 0.46  | 0.0767<br>(0.0568–0.0966)<br>P=6e-14    | 1e-5  |
| n-6 fatty acids [%]              | 12,528 | -0.237<br>(-0.257– -0.217)<br>P=1e-117      | -0.146<br>(-0.255– -0.0369)<br>P=0.009    | 0.11  | -0.326<br>(-0.424– -0.229)<br>P=6e-11   | 0.08  |
| PUFA [mmol/L]                    | 12,519 | 0.0349<br>(0.0261–0.0437)<br>P=6e-15        | 0.0219<br>(-0.00585–0.0497)<br>P=0.12     | 0.38  | 0.0878<br>(0.066–0.11)<br>P=8e-15       | 1e-5  |
| PUFA [%]                         | 12,519 | -0.237<br>(-0.262– -0.211)<br>P=1e-71       | -0.149<br>(-0.259– -0.0385)<br>P=0.008    | 0.13  | -0.336<br>(-0.434– -0.238)<br>P=2e-11   | 0.05  |
| MUFA [mmol/L]                    | 12,529 | 0.0731<br>(0.0675–0.0787)<br>P=2e-145       | 0.0422<br>(0.0113–0.073)<br>P=0.007       | 0.053 | 0.142<br>(0.117–0.166)<br>P=1e-28       | 8e-8  |
| MUFA [%]                         | 12,512 | 0.233<br>(0.216–0.25)                       | 0.135<br>(0.0179–0.252)                   | 0.10  | 0.359<br>(0.259–0.459)                  | 0.04  |

|                                 |        |                                             |                                          |      |                                           |       |
|---------------------------------|--------|---------------------------------------------|------------------------------------------|------|-------------------------------------------|-------|
|                                 |        | P=2e-159                                    | P=0.02                                   |      | P=3e-12                                   |       |
| Saturated fatty acids [mmol/L]  | 12,500 | 0.0651<br>(0.0592–0.071)<br>P=3e-102        | 0.0412<br>(0.00756–0.0749)<br>P=0.02     | 0.17 | 0.133<br>(0.104–0.162)<br>P=1e-18         | 8e-6  |
| Saturated fatty acids [%]       | 12,512 | 0.0552<br>(0.0226–0.0878)<br>P=0.0009       | 0.0271<br>(-0.179–0.234)<br>P=0.78       | 0.79 | 0.10<br>(-0.0355–0.236)<br>P=0.10         | 0.53  |
| Double bonds/<br>Fatty acid     | 12,525 | -0.00299<br>(-0.00369– -0.00228)<br>P=9e-17 | -0.00266<br>(-0.00543–0.00011)<br>P=0.06 | 0.82 | -0.00703<br>(-0.0095– -0.00456)<br>P=3e-8 | 0.002 |
| Methylene groups/<br>Fatty acid | 12,519 | 0.00743<br>(0.00477–0.0101)<br>P=5e-8       | 0.0133<br>(0.0013–0.0253)<br>P=0.03      | 0.35 | 0.0082<br>(-0.00473–0.0211)<br>P=0.2      | 0.91  |
| Fatty acid chain<br>length      | 12,489 | -0.00767<br>(-0.0132– -0.00212)<br>P=0.007  | 0.0021<br>(-0.0124–0.0166)<br>P=0.78     | 0.22 | -0.0335<br>(-0.0484– -0.0186)<br>P=1e-5   | 0.001 |
| Glucose [mmol/L]                | 12,630 | 0.0104<br>(0.00562–0.0152)<br>P=2e-5        | 0.0175<br>(-0.00319–0.0382)<br>P=0.10    | 0.51 | 0.0558<br>(0.0361–0.0755)<br>P=4e-8       | 1e-5  |
| Lactate [mmol/L]                | 12,629 | 0.00797<br>(0.0055–0.0104)<br>P=3e-10       | 0.00561<br>(-0.00924–0.0205)<br>P=0.46   | 0.76 | 0.032<br>(0.0203–0.0437)<br>P=1e-7        | 8e-5  |
| Pyruvate [μmol/l]               | 12,629 | 0.000701<br>(0.00046–0.00095)<br>P=2e-8     | 0.000516<br>(-0.00035–0.00138)<br>P=0.24 | 0.69 | 0.00224<br>(0.00155–0.00293)<br>P=3e-10   | 4e-5  |
| Citrate [μmol/l]                | 12,610 | -0.511<br>(-0.747– -0.274)<br>P=2e-5        | -0.616<br>(-2.06–0.824)<br>P=0.40        | 0.89 | -0.0565<br>(-0.656–0.543)<br>P=0.90       | 0.17  |
| Glycerol [μmol/l]               | 12,550 | 1.85<br>(1.3–2.4)<br>P=6e-11                | 0.364<br>(-0.873–1.6)<br>P=0.56          | 0.03 | 2.42<br>(1.38–3.47)<br>P=6e-6             | 0.34  |
| Alanine [μmol/l]                | 12,632 | 2.84<br>(2.3–3.39)<br>P=1e-24               | 1.09<br>(-1.11–3.3)<br>P=0.33            | 0.13 | 6.19<br>(4.26–8.11)<br>P=4e-10            | 0.001 |
| Glutamine [μmol/l]              | 12,617 | -2.52<br>(-3.45– -1.59)<br>P=1e-7           | 0.309<br>(-2.41–3.03)<br>P=0.82          | 0.05 | -1.84<br>(-4.24–0.553)<br>P=0.10          | 0.60  |
| Glycine [μmol/l]                | 12,578 | -0.818<br>(-1.28– -0.355)<br>P=0.0005       | 0.957<br>(-1.07–2.99)<br>P=0.36          | 0.09 | -1.55<br>(-2.94– -0.167)<br>P=0.03        | 0.33  |
| Histidine [μmol/l]              | 12,624 | 0.143<br>(-0.0276–0.313)<br>P=0.1           | 0.0927<br>(-0.356–0.542)<br>P=0.69       | 0.84 | 0.351<br>(-0.037–0.739)<br>P=0.08         | 0.34  |
| Homocysteine<br>[μmol/l]        | 3,729  | 0.0236<br>(0.00063–0.0465)<br>P=0.04        | 0.00511<br>(-0.214–0.224)<br>P=0.96      | 0.87 | —                                         | —     |
| Isoleucine [μmol/l]             | 12,628 | 1.13<br>(1.03–1.24)<br>P=2e-105             | 1.03<br>(0.594–1.47)<br>P=4e-6           | 0.65 | 1.94<br>(1.61–2.27)<br>P=2e-29            | 5e-6  |
| Leucine [μmol/l]                | 12,616 | 1.35<br>(1.27–1.43)<br>P=7e-249             | 1.29<br>(0.748–1.82)<br>P=3e-6           | 0.82 | 2.24<br>(1.82–2.65)<br>P=4e-25            | 4e-5  |
| Valine [μmol/l]                 | 12,093 | 2.14<br>(1.99–2.29)<br>P=4e-164             | 2.22<br>(1.15–3.29)<br>P=5e-5            | 0.89 | 3.34<br>(2.48–4.2)<br>P=7e-14             | 0.007 |
| Phenylalanine<br>[μmol/l]       | 12,631 | 1.15<br>(1.09–1.21)<br>P=2e-292             | 0.974<br>(0.35–1.60)<br>P=0.002          | 0.58 | 1.97<br>(1.58–2.35)<br>P=3e-23            | 4e-5  |
| Tyrosine [μmol/l]               | 12,634 | 0.770<br>(0.678–0.861)<br>P=1e-60           | 0.787<br>(0.423–1.15)<br>P=2e-5          | 0.93 | 1.36<br>(1.05–1.67)<br>P=2e-17            | 4e-4  |
| Acetate [μmol/l]                | 12,611 | -0.213<br>(-0.268– -0.159)<br>P=2e-14       | -0.0188<br>(-0.388–0.351)<br>P=0.92      | 0.31 | -0.209<br>(-0.534–0.116)<br>P=0.2         | 0.98  |
| log Acetoacetate<br>[μmol/l]    | 12,525 | -0.00751<br>(-0.0102– -0.00485)             | -0.00538<br>(-0.0236–0.0128)             | 0.82 | -0.0183<br>(-0.0361– -0.00054)            | 0.24  |

|                                                       |        |                                           |                                         |       |                                           |       |
|-------------------------------------------------------|--------|-------------------------------------------|-----------------------------------------|-------|-------------------------------------------|-------|
|                                                       |        | P=3e-8                                    | P=0.56                                  |       | P=0.04                                    |       |
| <i>log</i> beta-hydroxybutyrate [ $\mu\text{mol/l}$ ] | 12,510 | -0.0109<br>(-0.0136– -0.00814)<br>P=5e-15 | -0.01<br>(-0.0287–0.00866)<br>P=0.29    | 0.93  | -0.0266<br>(-0.0446– -0.00867)<br>P=0.004 | 0.09  |
| Creatinine [ $\mu\text{mol/l}$ ]                      | 12,595 | 0.0264<br>(-0.155–0.208)<br>P=0.80        | -0.131<br>(-0.559–0.296)<br>P=0.55      | 0.51  | -0.119<br>(-0.382–0.144)<br>P=0.4         | 0.37  |
| Urea [ $\mu\text{mol/l}$ ]                            | 12,580 | -0.0832<br>(-0.213–0.0467)<br>P=0.20      | -0.0976<br>(-1.81–1.61)<br>P=0.91       | 0.99  | 0.376<br>(-0.452–1.2)<br>P=0.4            | 0.28  |
| Albumin [cu]                                          | 12,643 | -8.2e-5<br>(-2.1e-4–4.3e-5)<br>P=0.20     | -0.00014<br>(-6.3e-4–3.5e-4)<br>P=0.58  | 0.82  | 0.000296<br>(-1.4e-4–7e-4)<br>P=0.2       | 0.10  |
| <i>log</i> C-reactive protein [mg/L]                  | 12,462 | 0.147<br>(0.133–0.162)<br>P=3e-84         | 0.112<br>(0.0364–0.188)<br>P=0.004      | 0.37  | 0.201<br>(0.164–0.237)<br>P=7e-26         | 0.008 |
| Phospholipase activity [nmol/ml/min]                  | 3,682  | 0.0273<br>(0.0151–0.0395)<br>P=1e-5       | 0.0545<br>(-0.00444–0.113)<br>P=0.07    | 0.38  | —                                         | —     |
| Glycoprotein acetyls [cu]                             | 12,636 | 0.0189<br>(0.0165–0.0213)<br>P=5e-53      | 0.0129<br>(0.00579–0.0199)<br>P=0.0004  | 0.12  | 0.0327<br>(0.0267–0.0387)<br>P=5e-26      | 3e-5  |
| <i>log</i> Alanine aminotransferase [U/L]             | 6,996  | 0.0263<br>(0.00902–0.0437)<br>P=0.003     | 0.0177<br>(-0.0181–0.0535)<br>P=0.33    | 0.67  | —                                         | —     |
| <i>log</i> gamma-glutamine aminotransferase [U/L]     | 12,156 | 0.0437<br>(0.0404–0.0469)<br>P=2e-152     | 0.0376<br>(0.0216–0.0536)<br>P=4e-6     | 0.46  | 0.0633<br>(0.0538–0.0727)<br>P=4e-37      | 1e-4  |
| <i>log</i> Bilirubin [ $\mu\text{mol/l}$ ]            | 8,067  | -0.0256<br>(-0.0379– -0.0133)<br>P=4e-5   | -0.00267<br>(-0.0504–0.045)<br>P=0.91   | 0.36  | —                                         | —     |
| <i>log</i> Leptin [ng/ml]                             | 3,761  | 0.12<br>(0.116–0.124)<br>P<1e-300         | 0.13<br>(0.0981–0.162)<br>P=1e-15       | 0.55  | —                                         | —     |
| Adiponectin [ $\mu\text{g/ml}$ ]                      | 3,922  | -0.21<br>(-0.266– -0.154)<br>P=2e-13      | -0.212<br>(-0.833–0.408)<br>P=0.50      | 0.99  | -0.522<br>(-0.596– -0.448)<br>P=3e-41     | 5e-11 |
| Testosterone (Men) [nmol/l]                           | 6,023  | -0.491<br>(-0.575– -0.408)<br>P=2e-30     | -0.472<br>(-1.06–0.111)<br>P=0.11       | 0.95  | -0.712<br>(-0.917– -0.506)<br>P=2e-11     | 0.05  |
| Testosterone (Women) [nmol/l]                         | 6,206  | 0.0249<br>(0.0153–0.0345)<br>P=4e-7       | 0.0108<br>(-0.0151–0.0366)<br>P=0.41    | 0.31  | —                                         | —     |
| <i>log</i> SHBG (men) [nmol/l]                        | 5,239  | -0.052<br>(-0.0563– -0.0476)<br>P=1e-120  | -0.0576<br>(-0.0779– -0.0374)<br>P=2e-8 | 0.59  | -0.0626<br>(-0.0706– -0.0546)<br>P=2e-45  | 0.02  |
| <i>log</i> SHBG (women) [nmol/l]                      | 4,550  | -0.0476<br>(-0.0571– -0.0382)<br>P=6e-23  | -0.0639<br>(-0.103– -0.0246)<br>P=0.001 | 0.43  | —                                         | —     |
| <i>log</i> Vitamin D [nmol/l]                         | 7,126  | -0.0113<br>(-0.0148– -0.00784)<br>P=2e-10 | 0.0145<br>(-0.0115–0.0406)<br>P=0.27    | 0.05  | -0.0197<br>(-0.0346– -0.00487)<br>P=0.01  | 0.28  |
| <i>log</i> Insulin [IU/L]                             | 12,262 | 0.0592<br>(0.0539–0.0645)<br>P=1e-106     | 0.0336<br>(0.0185–0.0487)<br>P=1e-5     | 0.002 | 0.111<br>(0.0982–0.124)<br>P=1e-59        | 2e-13 |
| Systolic blood pressure [mmHg]                        | 12,635 | 0.973<br>(0.857–1.09)<br>P=9e-61          | 1.09<br>(0.551–1.64)<br>P=8e-5          | 0.67  | 0.962<br>(0.688–1.24)<br>P=9e-12          | 0.94  |
| Diastolic blood pressure [mmHg]                       | 12,627 | 0.788<br>(0.717–0.859)<br>P=4e-106        | 1.12<br>(0.527–1.70)<br>P=0.0002        | 0.28  | 0.951<br>(0.726–1.18)<br>P=2e-16          | 0.17  |

Metabolite association magnitudes and causal effect estimates shown in Figure 3 are scaled to absolute concentrations units by multiplying by the SD for each metabolite measure (listed in Table S1). P-value for difference between cross-sectional association magnitudes and causal effect estimates, or longitudinal associations, were calculated using a Z-statistic. cu = standardized concentration unit.
