# Supplementary material for: Metabolic Signatures of Adiposity in Young Adults: Mendelian Randomization Analysis and Effects of Weight Change
Source: PubMed Central journal article supplement (PMC4260795; doi:10.1371/journal.pmed.1001765), 2014-12-09
Supplement: pmed.1001765.s008.pdf [file pmed.1001765.s008.pdf]

**Table S4: Suggestive sex interactions in causal effect estimates of BMI on metabolites.**

| Metabolite measure [unit]                | P for genetic interaction | Sex   | n    | Cross-sectional association [beta (95%CI); P per kg/m <sup>2</sup> ] | Causal effect estimate [beta (95%CI); P per kg/m <sup>2</sup> ] | P-value for difference* |
|------------------------------------------|---------------------------|-------|------|----------------------------------------------------------------------|-----------------------------------------------------------------|-------------------------|
| <i>log</i> Extremely large VLDL [μmol/L] | 0.0006                    | Men   | 6180 | 2.83 (2.5–3.15)<br>P=3e-65                                           | 3.13 (1.84–4.42)<br>P=2e-6                                      | 0.65                    |
|                                          |                           | Women | 6462 | 1.25 (1.16–1.35)<br>P=3e-143                                         | 0.257 (-0.408–0.922)<br>P=0.45                                  | 0.004                   |
| <i>log</i> Very large VLDL [μmol/L]      | 0.0003                    | Men   | 6180 | 6.42 (5.94–6.9)<br>P=3e-151                                          | 7.01 (4.15–9.87)<br>P=2e-6                                      | 0.69                    |
|                                          |                           | Women | 6462 | 3.00 (2.77–3.23)<br>P=7e-142                                         | 0.819 (-0.767–2.4)<br>P=0.31                                    | 0.008                   |
| <i>log</i> Large VLDL [mmol/L]           | 0.003                     | Men   | 6177 | 17.5 (16.4–18.7)<br>P=3e-208                                         | 17.3 (9.71–24.9)<br>P=8e-6                                      | 0.95                    |
|                                          |                           | Women | 6462 | 9.19 (9.19–9.19)<br>P=1e-149                                         | 3.78 (-0.903–8.45)<br>P=0.11                                    | 0.02                    |
| VLDL particle size [nm]                  | 0.009                     | Men   | 6181 | 0.113 (0.103–0.122)<br>P=7e-123                                      | 0.130 (0.0661–0.194)<br>P=7e-5                                  | 0.60                    |
|                                          |                           | Women | 6462 | 0.0744 (0.0673–0.0816)<br>P=7e-93                                    | 0.0255 (-0.0229–0.0738)<br>P=0.30                               | 0.05                    |
| n-6 fatty acids [%]                      | 0.009                     | Men   | 6128 | -0.321 (-0.361– -0.281); P=3e-55                                     | -0.285 (-0.455– -0.114); P=0.001                                | 0.68                    |
|                                          |                           | Women | 6400 | -0.173 (-0.209– -0.137); P=8e-21                                     | -0.0314 (-0.17–0.107); P=0.66                                   | 0.05                    |
| Polyunsaturated fatty acids [%]          | 0.008                     | Men   | 6124 | -0.316 (-0.367– -0.265); P=4e-34                                     | -0.289 (-0.463– -0.115); P=0.001                                | 0.77                    |
|                                          |                           | Women | 6395 | -0.18 (-0.22– -0.14); P=1.4e-18                                      | -0.0278 (-0.167–0.112); P=0.70                                  | 0.04                    |
| Saturated fatty acids [mmol/L]           | 0.002                     | Men   | 6390 | 0.0953 (0.0878–0.103); P=4e-137                                      | 0.0736 (0.0216–0.126); P=0.006                                  | 0.42                    |
|                                          |                           | Women | 6122 | 0.0438 (0.0372–0.0503); P=3e-39                                      | 0.0172 (-0.0261–0.0606); P=0.43                                 | 0.24                    |
| Saturated fatty acids [%]                | 4e-8                      | Men   | 6400 | 0.126 (0.0626–0.189); P=9e-5                                         | 0.222 (-0.0873–0.532); P=0.16                                   | 0.55                    |
|                                          |                           | Women | 6125 | 0.0104 (-0.0164–0.0373); P=0.45                                      | -0.0961 (-0.253–0.061); P=0.23                                  | 0.19                    |
| Glutamine [μmol/L]                       | 0.02                      | Men   | 6173 | -3.99 (-6.1– -1.87); P=0.0002                                        | -3.12 (-8.33–2.09); P=0.24                                      | 0.76                    |
|                                          |                           | Women | 6444 | -1.57 (-2.29– -0.848); P=2e-5                                        | 2.25 (-1.25–5.74); P=0.21                                       | 0.04                    |
| Glycine [μmol/L]                         | 0.03                      | Men   | 6151 | -1.85 (-2.48– -1.22); P=8e-9                                         | -0.956 (-3.42–1.51); P=0.45                                     | 0.49                    |
|                                          |                           | Women | 6427 | -0.128 (-0.751–0.496); P=0.69                                        | 2.69 (-0.349–5.73); P=0.08                                      | 0.08                    |
| Homocysteine [μmol/l]                    | 0.0008                    | Men   | 1716 | 0.00713 (-0.0317–0.046); P=0.72                                      | -0.164 (-0.437–0.109); P=0.24                                   | 0.22                    |
|                                          |                           | Women | 2013 | 0.0345 (0.0068–0.0623); P=0.015                                      | 0.166 (-0.191–0.522); P=0.36                                    | 0.47                    |
| Isoleucine [μmol/L]                      | 0.01                      | Men   | 6176 | 1.51 (1.38–1.63); P=9e-116                                           | 1.53 (0.778–2.29); P=7e-5                                       | 0.94                    |
|                                          |                           | Women | 6452 | 0.883 (0.729–1.04); P=3e-29                                          | 0.686 (0.199–1.17); P=0.006                                     | 0.45                    |
| <i>log</i> Acetoacetate [μmol/L]         | 0.02                      | Men   | 6118 | -0.0112 (-0.0151– -0.00719)<br>P=4e-8                                | -0.0238 (-0.0506–0.00307)<br>P=0.08                             | 0.36                    |
|                                          |                           | Women | 6407 | -0.00483 (-0.00842– -0.00123)<br>P=0.009                             | 0.0122 (-0.0125–0.0368)<br>P=0.33                               | 0.18                    |
| <i>log</i> beta-hydroxybutyrate [μmol/L] | 4e-5                      | Men   | 6123 | -0.0168 (-0.0212– -0.0124)<br>P=8e-14                                | -0.0318 (-0.0588– -0.00485)<br>P=0.02                           | 0.28                    |
|                                          |                           | Women | 6387 | -0.00643 (-0.0102– -0.00265)<br>P=0.0009                             | 0.00983 (-0.0159–0.0355)<br>P=0.45                              | 0.22                    |
| Creatinine [μmol/L]                      | 0.03                      | Men   | 6161 | 0.0975 (-0.122–0.317);<br>P=0.38                                     | -0.433 (-1.06–0.193)<br>P=0.18                                  | 0.12                    |
|                                          |                           | Women | 6434 | -0.035 (-0.18–0.11)<br>P=0.64                                        | 0.0684 (-0.37–0.507)<br>P=0.76                                  | 0.66                    |
| <i>log</i> Insulin [IU/L]                | 0.0006                    | Men   | 5952 | 0.0676 (0.0576–0.0775)<br>P=2e-40                                    | 0.0548 (0.0315–0.0781)<br>P=4e-6                                | 0.32                    |
|                                          |                           | Women | 6310 | 0.054 (0.0498–0.0583)<br>P=1e-136                                    | 0.0161 (-0.00369–0.0359)<br>P=0.11                              | 0.0002                  |
| Diastolic blood pressure [mmHg]          | 0.01                      | Men   | 6183 | 0.986 (0.897–1.07)<br>P=1.2e-105                                     | 1.36 (0.844–1.87)<br>P=2e-7                                     | 0.16                    |
|                                          |                           | Women | 6444 | 0.655 (0.533–0.776)<br>P=3e-26                                       | 0.865 (0.0861–1.64)<br>P=0.03                                   | 0.60                    |

Association magnitudes and causal effect estimates in absolute concentration units.

\* Test of difference between cross-sectional association magnitude and causal effect estimate, with P-value calculated using a Z-statistic.
