# Supplementary material for: Metabolic Signatures of Adiposity in Young Adults: Mendelian Randomization Analysis and Effects of Weight Change
Source: PubMed Central journal article supplement (PMC4260795; doi:10.1371/journal.pmed.1001765), 2014-12-09
Supplement: pmed.1001765.s009.pdf [file pmed.1001765.s009.pdf]

**Table S5: Metabolite changes paralleled by weight loss and weight gain during 6-y follow-up in absolute concentration units.**

| <b>Metabolite measure [unit]</b> | <b>6–10% weight loss Median [95% CI]</b> | <b>3–6% weight loss Median [95% CI]</b> | <b>3–6% weight gain Median [95% CI]</b> | <b>6–10% weight gain Median [95% CI]</b> |
|----------------------------------|------------------------------------------|-----------------------------------------|-----------------------------------------|------------------------------------------|
| Extremely large VLDL [μmol/L]    | -0.00242 [-0.00342- -0.00221]            | -0.00221 [-0.00292- -0.00199]           | 0.00176 [-0.000495-0.00378]             | 0.00208 [0.000739-0.00557]               |
| Very large VLDL [μmol/L]         | -0.00541 [-0.013- -0.00134]              | -0.0065 [-0.00964- -0.00134]            | 0.00315 [-0.00134-0.012]                | 0.0132 [0.0045-0.0206]                   |
| Large VLDL [μmol/L]              | -0.03 [-0.0514- -0.0128]                 | -0.0239 [-0.0369- -0.00931]             | 0.0326 [0.00279-0.0447]                 | 0.0444 [0.0175-0.0718]                   |
| log Medium VLDL [mmol/L]         | -0.051 [-0.0806- -0.0216]                | -0.0299 [-0.0608- -0.00228]             | 0.0338 [-0.00276-0.0586]                | 0.0593 [0.0432-0.0761]                   |
| Small VLDL [mmol/L]              | -0.0616 [-0.105- -0.0305]                | -0.0391 [-0.0639- -0.0154]              | 0.0449 [0.00976-0.0657]                 | 0.0541 [0.0276-0.106]                    |
| Very small VLDL [mmol/L]         | -0.044 [-0.0716- -0.0191]                | -0.0135 [-0.0318- -0.000406]            | 0.0143 [-0.00501-0.0331]                | 0.0358 [0.0183-0.0529]                   |
| IDL [mmol/L]                     | -0.0833 [-0.138- -0.0613]                | -0.0116 [-0.0434-0.0294]                | 0.0316 [0.00281-0.0681]                 | 0.0492 [0.0166-0.0778]                   |
| Large LDL [mmol/L]               | -0.108 [-0.16- -0.0556]                  | -0.00359 [-0.0706-0.0311]               | 0.053 [0.0131-0.0985]                   | 0.0506 [-0.00471-0.0874]                 |
| Medium LDL [mmol/L]              | -0.071 [-0.0988- -0.0327]                | -0.0162 [-0.0456-0.0127]                | 0.0395 [0.0166-0.0664]                  | 0.03 [-0.0128-0.0616]                    |
| Small LDL [mmol/L]               | -0.0546 [-0.0665- -0.0306]               | -0.0142 [-0.0298-0.00166]               | 0.0275 [0.0165-0.0483]                  | 0.0194 [0.00146-0.0571]                  |
| Very large HDL [mmol/L]          | 0.0715 [0.0306-0.092]                    | 0.0146 [-0.0162-0.029]                  | -0.000868 [-0.024-0.0254]               | -0.0127 [-0.0393-0.0167]                 |
| Large HDL [mmol/L]               | 0.0463 [2.4e-05-0.0887]                  | 0.0441 [0.00166-0.0843]                 | -0.0453 [-0.0799- -0.00748]             | -0.04 [-0.0639-0.000217]                 |
| Medium HDL [mmol/L]              | -0.0378 [-0.0763- -0.016]                | -0.0242 [-0.0487-0.0121]                | -0.0107 [-0.0471-0.0613]                | 0.0285 [-0.00153-0.0597]                 |
| Small HDL [mmol/L]               | -0.041 [-0.0697- -0.0152]                | -0.000858 [-0.0328-0.0229]              | 0.00971 [-0.0206-0.0395]                | -0.00157 [-0.0272-0.039]                 |
| VLDL particle size [nm]          | -0.324 [-0.435- -0.146]                  | -0.247 [-0.459- -0.0312]                | 0.238 [0.107-0.448]                     | 0.335 [0.0978-0.552]                     |
| LDL particle size [nm]           | 0.0325 [0.00743-0.0529]                  | 0.0229 [-0.00292-0.0371]                | -0.0414 [-0.0689- -0.0233]              | -0.0129 [-0.0318-0.0175]                 |
| HDL particle size [nm]           | 0.0482 [0.0252-0.067]                    | 0.0168 [-0.00304-0.0439]                | -0.0173 [-0.0428- -0.000669]            | -0.0343 [-0.0524-0.00938]                |
| Total cholesterol [mmol/L]       | -0.212 [-0.393- -0.118]                  | -0.107 [-0.193-0.0237]                  | 0.132 [0.0262-0.209]                    | 0.0861 [0.00245-0.244]                   |
| Non-HDL cholesterol [mmol/L]     | -0.219 [-0.322- -0.139]                  | -0.0904 [-0.199-0.000176]               | 0.126 [0.0326-0.237]                    | 0.115 [0.0505-0.212]                     |
| VLDL cholesterol [mmol/L]        | -0.0588 [-0.0999- -0.0156]               | -0.0419 [-0.0662- -0.00357]             | 0.024 [-0.0147-0.0555]                  | 0.0472 [-0.0122-0.0923]                  |
| IDL cholesterol [mmol/L]         | -0.0463 [-0.0792- -0.0137]               | -0.00632 [-0.0203-0.00885]              | 0.00735 [-0.0119-0.0396]                | 0.0317 [0.0083-0.0432]                   |
| LDL cholesterol [mmol/L]         | -0.17 [-0.236- -0.0893]                  | -0.0534 [-0.109-0.0141]                 | 0.0742 [0.021-0.114]                    | 0.0752 [-0.0376-0.126]                   |
| HDL cholesterol [mmol/L]         | 0.0322 [-0.0184-0.0634]                  | 0.0186 [-0.0189-0.0592]                 | 0.00495 [-0.0565-0.0339]                | -0.0145 [-0.103-0.0478]                  |
| Cholesterol esterification [%]   | -0.000185 [-0.00346-0.00293]             | -0.00157 [-0.00282-0.00154]             | -0.000916 [-0.00334-0.00284]            | 0.000919 [-0.00227-0.0042]               |
| Apolipoprotein B [g/l]           | -0.07 [-0.0974- -0.0461]                 | -0.03 [-0.0487- -0.00969]               | 0.0275 [0.00555-0.0578]                 | 0.0528 [0.0263-0.0727]                   |
| Apolipoprotein A1 [g/l]          | 0.000112 [-0.0558-0.016]                 | -0.0169 [-0.0403-0.00896]               | 0.0212 [-0.0239-0.0522]                 | -0.00383 [-0.0484-0.0368]                |

| <b>Metabolite measure<br/>[unit]</b>    | <b>6–10% weight loss<br/>Median [95% CI]</b> | <b>3–6% weight loss<br/>Median [95% CI]</b> | <b>3–6% weight gain<br/>Median [95% CI]</b> | <b>6–10% weight gain<br/>Median [95% CI]</b> |
|-----------------------------------------|----------------------------------------------|---------------------------------------------|---------------------------------------------|----------------------------------------------|
| <i>log</i> Triglycerides<br>[mmol/L]    | -0.0638<br>[-0.0966- -0.0357]                | -0.0338<br>[-0.0626- -0.012]                | 0.0376<br>[0.00554-0.0636]                  | 0.0784<br>[0.0477-0.114]                     |
| Phosphoglycerides<br>[mmol/L]           | -0.0376<br>[-0.064-0.00187]                  | -0.0129<br>[-0.0342-0.0116]                 | 0.000255<br>[-0.0207-0.0419]                | 0.0131<br>[-0.019-0.0484]                    |
| Phosphatidylcholines<br>[mmol/L]        | -0.0702<br>[-0.11- -0.0101]                  | -0.0204<br>[-0.0725-0.0394]                 | 0.046<br>[-0.0432-0.0933]                   | 0.0282<br>[-0.0399-0.0867]                   |
| Sphingomyelin<br>[mmol/L]               | -0.0106<br>[-0.0284-0.0094]                  | 0.00247<br>[-0.0059-0.0134]                 | 0.00478<br>[-0.0125-0.0147]                 | -0.00104<br>[-0.0152-0.00493]                |
| Total fatty acids<br>[mmol/L]           | -0.731<br>[-1.09- -0.352]                    | -0.328<br>[-0.55- -0.0261]                  | 0.402<br>[-0.0851-0.86]                     | 0.526<br>[0.241-0.994]                       |
| Docosahexaenoic acid<br>[mmol/L]        | -0.0108<br>[-0.0213- -0.00193]               | -0.00387<br>[-0.0145-0.00539]               | 0.0153<br>[0.00184-0.0257]                  | 0.00146<br>[-0.00637-0.0113]                 |
| Linoleic acid<br>[mmol/L]               | -0.117<br>[-0.182- -0.0548]                  | -0.0412<br>[-0.113-0.0283]                  | 0.0681<br>[-0.0393-0.173]                   | 0.111<br>[0.0553-0.203]                      |
| n-3 fatty acids<br>[mmol/L]             | -0.0198<br>[-0.0383- -0.00278]               | -0.0172<br>[-0.0357-0.00428]                | 0.0271<br>[0.00428-0.0519]                  | 0.0126<br>[-0.00177-0.0471]                  |
| n-3 fatty acids<br>[%]                  | 0.0456<br>[-0.138-0.19]                      | -0.0239<br>[-0.144-0.177]                   | 0.00848<br>[-0.128-0.156]                   | -0.0226<br>[-0.233-0.112]                    |
| n-6 fatty acids<br>[mmol/L]             | -0.152<br>[-0.255- -0.0333]                  | -0.0432<br>[-0.138-0.0387]                  | 0.0834<br>[-0.0445-0.197]                   | 0.137<br>[0.0363-0.21]                       |
| n-6 fatty acids<br>[%]                  | 1.04<br>[0.431-2.01]                         | 0.425<br>[-0.299-1.02]                      | -0.466<br>[-1.32-0.513]                     | -0.646<br>[-1.35-0.232]                      |
| Polyunsaturated fatty<br>acids [mmol/L] | -0.132<br>[-0.258- -0.0164]                  | -0.0745<br>[-0.171-0.0571]                  | 0.129<br>[-0.0238-0.257]                    | 0.104<br>[0.0502-0.248]                      |
| Polyunsaturated fatty<br>acids [%]      | 0.0103<br>[0.000677-0.017]                   | 0.0065<br>[0.000202-0.0115]                 | -0.00268<br>[-0.00986-0.00482]              | -0.00479<br>[-0.0141-0.00377]                |
| Monounsaturated fatty<br>acids [mmol/L] | -0.314<br>[-0.428- -0.175]                   | -0.0985<br>[-0.258-0.0907]                  | 0.129<br>[0.00119-0.346]                    | 0.192<br>[0.0779-0.358]                      |
| Monounsaturated fatty<br>acids [%]      | -0.00648<br>[-0.0126- -0.000205]             | -0.00623<br>[-0.00952-0.0014]               | 0.00342<br>[-0.00217-0.00943]               | 0.00387<br>[-0.00235-0.012]                  |
| Saturated fatty acids<br>[mmol/L]       | -0.245<br>[-0.387- -0.0822]                  | -0.146<br>[-0.219-0.0114]                   | 0.127<br>[-0.0282-0.281]                    | 0.228<br>[0.025-0.387]                       |
| Saturated fatty acids<br>[%]            | 0.00102<br>[-0.00542-0.00608]                | -0.00382<br>[-0.00876- -0.0011]             | -0.00423<br>[-0.00899-0.00252]              | 0.000785<br>[-0.00505-0.00934]               |
| Double bonds/<br>Fatty acid             | 0.00307<br>[-0.00508-0.0147]                 | 0.0122<br>[-0.000349-0.0247]                | 0.00392<br>[-0.0149-0.0171]                 | -0.0177<br>[-0.0351-0.000948]                |
| Methylene groups/<br>Fatty acid         | -0.0538<br>[-0.0801- -0.00885]               | -0.00512<br>[-0.0249-0.0361]                | -0.000486<br>[-0.04-0.0427]                 | 0.00781<br>[-0.0539-0.0778]                  |
| Fatty acid<br>chain length              | 0.0162<br>[-0.0274-0.0552]                   | 0.0384<br>[0.0083-0.0757]                   | 0.0115<br>[-0.0257-0.0405]                  | -0.0272<br>[-0.0758-0.0235]                  |
| Glucose<br>[mmol/L]                     | -0.132<br>[-0.182- -0.0324]                  | -0.0824<br>[-0.142-0.0276]                  | 0.0676<br>[-0.0924-0.133]                   | 0.0176<br>[-0.102-0.138]                     |
| Lactate<br>[mmol/L]                     | -0.00141<br>[-0.111-0.0386]                  | 0.0136<br>[-0.0314-0.109]                   | 0.00859<br>[-0.0314-0.109]                  | 0.0286<br>[-0.0164-0.119]                    |
| Pyruvate<br>[μmol/l]                    | -0.00474<br>[-0.00934- -0.00104]             | 0.00126<br>[-0.00224-0.00421]               | -0.00104<br>[-0.00584-0.00676]              | 0.00396<br>[-0.00204-0.00716]                |
| Citrate<br>[μmol/l]                     | 0.00486<br>[0.000158-0.00876]                | -0.00114<br>[-0.00414-0.00386]              | 0.00186<br>[-0.00374-0.00456]               | 0.00386<br>[-0.00364-0.00686]                |
| Glycerol<br>[μmol/l]                    | 0.00219<br>[-0.00776-0.00799]                | -0.00171<br>[-0.00841-0.00609]              | 0.00499<br>[-0.000711-0.0109]               | 0.00479<br>[-0.00111-0.0114]                 |
| Alanine<br>[μmol/l]                     | -0.015<br>[-0.026- -0.011]                   | -0.005<br>[-0.016-0.008]                    | 0.013<br>[0.002-0.023]                      | 0.0045<br>[-0.01-0.0155]                     |
| Glutamine<br>[μmol/l]                   | -0.00666<br>[-0.0166-0.0113]                 | 0.00734<br>[-0.00966-0.0213]                | 0.00234<br>[-0.0117-0.0123]                 | -0.0292<br>[-0.0387- -0.0142]                |

| <b>Metabolite measure [unit]</b>                   | <b>6–10% weight loss Median [95% CI]</b> | <b>3–6% weight loss Median [95% CI]</b> | <b>3–6% weight gain Median [95% CI]</b> | <b>6–10% weight gain Median [95% CI]</b> |
|----------------------------------------------------|------------------------------------------|-----------------------------------------|-----------------------------------------|------------------------------------------|
| Glycine [μmol/l]                                   | 4.66e-05<br>[-0.00795-0.00805]           | 0.00205<br>[-0.011-0.01]                | 4.66e-05<br>[-0.00945-0.00755]          | -0.00995<br>[-0.019-0.00205]             |
| Histidine [μmol/l]                                 | -0.00317<br>[-0.00587- -0.000866]        | 0.000334<br>[-0.00167-0.00263]          | 0.00193<br>[-0.000566-0.00403]          | -0.00162<br>[-0.00427-0.000834]          |
| Isoleucine [μmol/l]                                | -0.00476<br>[-0.00661- -0.00191]         | -0.000612<br>[-0.00331-0.00119]         | 0.00239<br>[0.000688-0.00399]           | 0.00339<br>[0.000388-0.00629]            |
| Leucine [μmol/l]                                   | -0.00575<br>[-0.00775- -0.00405]         | -0.000247<br>[-0.00305-0.00255]         | 0.00315<br>[0.000253-0.0063]            | 0.0022<br>[-0.000247-0.00605]            |
| Valine [μmol/l]                                    | -0.00834<br>[-0.0143- -0.00234]          | 0.000659<br>[-0.00634-0.00566]          | 0.00966<br>[0.00366-0.0167]             | 0.00266<br>[-0.00284-0.00766]            |
| Phenylalanine [μmol/l]                             | -0.0045<br>[-0.0058- -0.0022]            | -0.001<br>[-0.0032-0.000696]            | 0.0022<br>[0.000396-0.00545]            | 0.0026<br>[0.00105-0.0045]               |
| Tyrosine [μmol/l]                                  | -0.00285<br>[-0.00535- -0.00105]         | -0.00155<br>[-0.00345-0.000847]         | 0.00265<br>[0.000847-0.0043]            | 0.0025<br>[0.000297-0.00425]             |
| Acetate [μmol/l]                                   | 0.000635<br>[-0.000665-0.00324]          | 0.000435<br>[-0.00166-0.00204]          | -0.000565<br>[-0.00216-0.00229]         | 0.000985<br>[-0.00221-0.00324]           |
| <i>log</i> Acetoacetate [μmol/l]                   | 0.00296<br>[-0.11-0.101]                 | 0.0898<br>[-0.017-0.222]                | -0.0425<br>[-0.151-0.082]               | -0.0771<br>[-0.152-0.0114]               |
| <i>log</i> beta-hydroxy-butyrate [μmol/l]          | -0.0406<br>[-0.14-0.0761]                | 0.0361<br>[-0.0396-0.105]               | -0.0697<br>[-0.201-0.0496]              | -0.0632<br>[-0.131-0.0164]               |
| Creatinine [μmol/l]                                | -0.000763<br>[-0.00246-0.00104]          | 0.00114<br>[-0.000163-0.00344]          | 0.000637<br>[-0.000563-0.00214]         | -0.00181<br>[-0.00336-0.000137]          |
| Urea [μmol/l]                                      | -0.00241<br>[-0.0109-0.00619]            | 0.00469<br>[-0.000406-0.0103]           | 9.36e-05<br>[-0.00756-0.00829]          | 0.00649<br>[-0.00441-0.0105]             |
| Albumin [cu]                                       | -0.00186<br>[-0.00288-0.000799]          | 2.39e-05<br>[-0.000976-0.00112]         | -0.000513<br>[-0.00264-0.001]           | -0.00254<br>[-0.00403- -0.000651]        |
| <i>log</i> C-reactive protein [mg/L]               | -0.266<br>[-0.426- -0.149]               | -0.18<br>[-0.316- -0.061]               | 0.281<br>[0.119-0.4]                    | 0.451<br>[0.306-0.644]                   |
| Glycoprotein acetyls [cu]                          | -0.0922<br>[-0.122- -0.0522]             | -0.0522<br>[-0.0722- -0.0222]           | 0.00776<br>[-0.0321-0.0478]             | 0.0478<br>[-0.00224-0.0678]              |
| <i>log</i> gamma-glutamine amino-transferase [U/L] | -0.111<br>[-0.195- -0.111]               | -0.0748<br>[-0.111- -0.0158]            | 0.101<br>[0.0632-0.129]                 | 0.157<br>[0.043-0.207]                   |
| Adiponectin [ug/mL]                                | 0.441<br>[0.106-1.03]                    | -0.0325<br>[-0.469-0.384]               | -0.962<br>[-1.32- -0.175]               | -0.774<br>[-1.16- -0.413]                |
| Testosterone (Men) [nmol/l]                        | 1.43<br>[0.527-2.43]                     | 1.03<br>[-0.273-1.63]                   | -0.823<br>[-1.57-0.427]                 | -1.47<br>[-2.17- -0.773]                 |
| <i>log</i> SHBG (men) [nmol/l]                     | 0.101<br>[0.0641-0.178]                  | 0.063<br>[0.0277-0.0907]                | -0.105<br>[-0.15- -0.0621]              | -0.116<br>[-0.168- -0.0858]              |
| <i>log</i> Vitamin D [nmol/l]                      | 0.0628<br>[0.011-0.11]                   | 0.0192<br>[-0.037-0.0637]               | 0.0144<br>[-0.0278-0.0692]              | -0.0481<br>[-0.126-0.0324]               |
| <i>log</i> Insulin [IU/L]                          | -0.214<br>[-0.339- -0.0984]              | -0.0913<br>[-0.228-0.00664]             | 0.146<br>[0.059-0.228]                  | 0.216<br>[0.0796-0.35]                   |
| Systolic blood pressure [mmHg]                     | -1.28<br>[-3.28-0.716]                   | -1.28<br>[-2.62-1.38]                   | 0.716<br>[-0.951-2.05]                  | 2.72<br>[-0.617-4.05]                    |
| Diastolic blood pressure [mmHg]                    | -1.28<br>[-3.61-0.392]                   | -2.28<br>[-3.61- -0.942]                | 1.06<br>[-0.942-2.39]                   | 2.39<br>[1.06-5.06]                      |

Metabolite changes paralleled by weight loss and weight gain during 6-y follow-up in the four categories of weight change shown in Figure 7 scaled to absolute concentrations units. The metabolite changes are median [95% confidence intervals]. The four weight change categories are 6–10% weight loss (n=169; mean (SD) loss 5.5±1.1 kg); 3–6% weight loss (3.2±0.9 kg, n=205); 3–6% weight gain (3.2±0.9 kg, n=168); 6–10% weight gain (5.9±1.7 kg, n=138).
